# Supplementary material
Source: HighWire-hosted journal article supplement (https://erj.ersjournals.com/content/52/2/1800310)
Supplement: inline-supplementary-material-1 [file inline-supplementary-material-1.pdf]

## **Supplementary materials**

### **Microarray analysis**

Microarray analysis was conducted in two stages.

First, asthmatics and controls were pooled to obtain sufficient power to determine the effect of IL-1 $\beta$  on gene expression in airway smooth muscle cells (ASMC) (n=6, dataset A).

To validate these findings, we investigated a second independent dataset from 2 asthmatic and 4 healthy-derived ASMC cultures treated with IL-1 $\beta$  10 ng/ml for 8 hours (dataset B). Where again asthmatics and controls were pooled to determine the effect of IL-1 $\beta$  on gene expression in ASMC.

Second, subjects in dataset A were separated based on health status and analysis was conducted on the subset of genes altered by IL-1 $\beta$ , comparing the change in expression to IL-1 $\beta$  in asthmatics to the change in expression of IL-1 $\beta$  in healthy controls (Fold change  $\pm$  2, FDR<0.05). All microarray analysis was performed using the computing environment R (R Development Core Team, 2013, version 3.02). Additional software packages (limma) were taken from the Bioconductor project, and normalised using Robust Multi-array Average.

### **Cell culture**

#### *ASMC*

ASMC n=6 were isolated from asthmatic and healthy controls and cultured as previously described<sup>1, 2</sup>. At passage 3-4, ASMC were seeded at 1x10<sup>4</sup> cell/cm<sup>2</sup> and grown in Dulbecco's modification of Eagle's medium (DMEM, Invitrogen, Carlsbad, CA, USA), 5% fetal bovine serum FBS and 1% antibiotics (Invitrogen) for 3-4 days to confluence. Cells were quiesced for 72 hours in DMEM with 0.1% bovine serum albumin (BSA, (Sigma Aldrich, St Louis,

MO, USA) and then treated with vehicle (0.1% BSA) or, 10 ng/ml IL-1 $\beta$  (R&D Systems).

Total cellular mRNA was isolated using the Qiagen total RNA isolation kit (Qiagen, Doncaster, VIC, Australia) following 0 or 8 hours stimulation and finally stored at -80°C (dataset A). Total mRNA was collected for microarray analysis.

#### *Immortalised ASMC*

For *in vitro* validation and functional studies, primary ASMC were immortalised using the hTERT over expression system, as previously described<sup>3</sup>. Moderate asthmatic, mild asthmatic and healthy ASMC, defined by the Global Initiative for Asthma (GINA) guidelines were seeded at 1x10<sup>4</sup> cells per cm<sup>2</sup> in 6 well plates and grown to confluence in DMEM(Invitrogen) supplemented with 10% FBS (JRH Biosciences) and 1% antibiotics (Invitrogen). Cells were quiesced in 0.1% BSA in DMEM for 3 days and subsequently treated with IL-1 $\beta$  (10 ng/ml) and control. mRNA was collected at 8 hours for realtime PCR while supernatants for CCL20 ELISAs were collected at 24 hours.

#### *CALU-3 cells*

CALU- 3 cells were grown to confluence in 75cm<sup>2</sup> flasks in complete Dulbecco's Modified Eagle's medium (F-12 containing 10% (v/v) foetal bovine serum, 1% (v/v) nonessential amino acid solution and 1% (v/v) L-glutamine solution).

#### **Microarray candidate validation**

Real-time PCR was conducted on total mRNA using Taqman primer CCL20 (Life Technologies, Mulgrave, VIC, AUS). Samples with no expression were given the value Ct=35. Samples were normalised to their untreated controls. CCL20 protein levels were

accessed using CCL20/MIP-3 $\alpha$  ELISA (R&D Systems). Samples below the detection limit were given the value 16 pg/ml the detection limit of the ELISA.

## **RNA extraction, Sample preparation and High-throughput sequencing**

Bronchial biopsies were taken from segmental divisions of the main bronchi. Biopsies frozen in Tissue-Tek (VWR, Radnor, PA) at -80°C were thawed at room temperature and cut from the blocks when they were semi-solid. Total RNA was extracted using AllPrep DNA/RNA Mini kit (Qiagen, Venlo, the Netherlands). Samples were lysed in 600  $\mu$ l RLT-plus buffer using an IKA Ultra Turrax T10 Homogenizer, and RNA was purified according to the manufacturer's instructions. RNA samples were dissolved in 30  $\mu$ l RNase free water. Concentrations and quality of RNA were checked using a Nanodrop-1000 and run on a Labchip GX (PerkinElmer, Waltham, MA).

RNA samples were further processed using the TruSeq Stranded Total RNA Sample Preparation Kit (Illumina, San Diego, CA), using an automated procedure in a Caliper Sciclone NGS Workstation (PerkinElmer, Waltham, MA). In this procedure, all cytoplasmic and mitochondria rRNA was removed (RiboZero Gold kit). The obtained cDNA fragment libraries were loaded in pools of multiple samples unto an Illumina HiSeq2500 sequencer using default parameters for paired-end sequencing (2  $\times$  100 bp).

## **Gene expression quantification**

The trimmed fastQ files were aligned to build b37 of the human reference genome using HISAT (version 0.1.5) allowing for 2 mismatches (Kim et al. 2015). Before gene quantification SAMtools (version 1.2) was used to sort the aligned reads (Li et al. 2009). The

gene level quantification was performed by HTSeq (version 0.6.1p1) using Ensembl version 75 as gene annotation database.

## **Quality Control**

Quality control (QC) metrics were calculated for the raw sequencing data, using the FastQC tool (version 0.11.3) (Andrews 2010). Alignments of 220 subjects were obtained. QC metrics were calculated for the aligned reads using Picard-tools (version 1.130) (<http://picard.sourceforge.net>) CollectRnaSeqMetrics, MarkDuplicates, CollectInsertSizeMetrics and SAMtools flagstat. We discarded 36 samples due to poor alignment metrics. In addition, we checked for concordance between sexlinked (*XIST* and Y-chromosomal genes) gene expression and reported sex. All samples were concordant. This resulted in high quality RNAseq data from 184 subjects.

## **Differential expression**

Raw counts of expressed features were analysed using the R-package DESeq2 (Love et al. 2014). Feature counts were set as the dependent variable, with asthma status as the predictor variable. Sex, current smoking, and age were entered as co-variables.

## **Immunohistochemistry**

Tissue staining for CCR6 with the rabbit anti-human CCR6 (R&D Systems) [0.2 µg/ml] was conducted as previously described <sup>3</sup>.

## **Air liquid interface**

CALU-3

To establish the air-liquid interface model CALU-3 cells were seeded onto Transwell polyester inserts (Sigma Aldrich) at a density of  $5 \times 10^5$  cells/cm<sup>2</sup> in 100  $\mu$ L apical and 500  $\mu$ L basolateral medium. The apical medium was removed 24 hours after seeding and cells were allowed to grow for 5-7 days, with basolateral medium changed at day 4. On day 5 of treatment the apical layer of the transwells was washed with HEPES for 1 hour to remove any mucus. Cells were treated with either CCL20 (10ng/ml), rabbit anti-human CCL20 antibody (Abcam), isotype control (DakoCytomation), rabbit anti human CCL20 antibody + CCL20 10ng/ml, Isotype control + CCL20 (10ng/ml) and complete DMEM (control) in the basolateral side for 48 hours.

#### Primary airway epithelium

Air liquid interface (ALI) cultured primary epithelial cells was conducted according to a previous publication<sup>4</sup>. Briefly, primary epithelial cells obtained from the enzymatic digestion of bronchial tissue were seeded at 75,000 in 200 $\mu$ L Bronchial Epithelial Cell Growth Medium (BEGM) in the apical part of the insert and 500 $\mu$ L BEGM at the basolateral part. When the cell-layer was confluent (3-5 days) the cells were exposed to air at the apical side and Dulbecco's Modified Eagle Medium (DMEM) / BEBM (1:1) with retinoic acid (15ng/ml) added to the basolateral side (500 $\mu$ L). Media was refreshed every 3 days with DMEM / BEBM (1:1) with retinoic acid (15ng/ml). Cells were quiesced on day 28 with BEBM medium for 24H and then treated with CCL20 10ng/ml or PBS for 48H. ALI apical washes (BEBM medium 5 minutes) were conducted following treatment and MUC5AC was measured by ELISA (SEA756Hu, Cloud-Clone Corp., China).

116 MUC5AC ELISA

117 MUC5AC levels in apical washes (2x dilution) were measured using the ELISA kit  
118 (SEA756Hu, Cloud-Clone Corp., China) according to the manufacturer's protocol.

119

120

121 Alcian Blue Staining

122 Following treatment transwells were washed with PBS. Cells were fixed with 4% (v/v)  
123 paraformaldehyde for 20 minutes. Transwells were then washed with PBS and stained using  
124 alcian blue (1% (w/v) alcian blue in 3% (v/v) acetic acid/water at pH 2.5)(Sigma-Aldrich) for  
125 15 minutes. Following the staining the transwells were rinsed multiple times with PBS and  
126 allowed to air-dry overnight. The transwell's filter was then cut out with a sharp point scalpel  
127 and mounted on a glass slide using Entellan new mounting medium (Merck Millipore).

128 Sections were imaged on an Olympus BX60 microscope (Olympus, Hamburg, Germany) with  
129 manual light exposure and 'one push' white balance on a background region. Images were  
130 then taken using an attached DP71 camera (Olympus) at 20X magnification and recorded  
131 using Kodak software. Each image was analysed using Image J (v1.42q, NIH) with Colour  
132 deconvolution plugin. Images were separated based on alcian blue stain colours and  
133 densitometry mean was determined for 5 representative images of each insert and averaged.

134

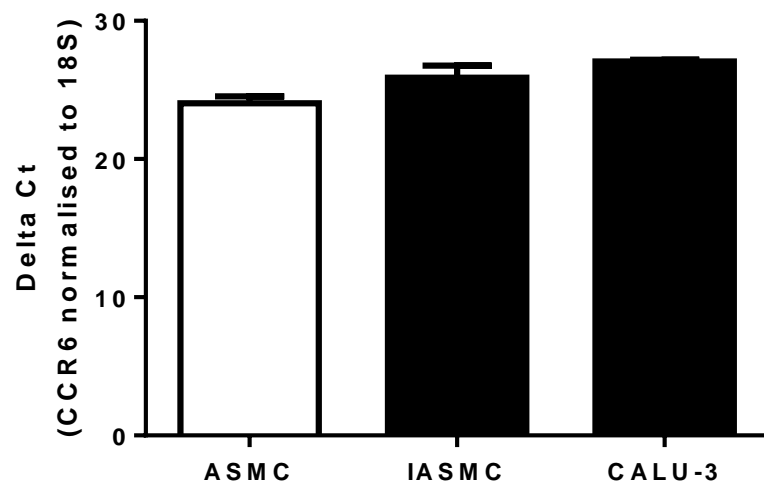

**Figure S1 Gene expression of CCR6 in structural cells in the airways.**

CCR6 mRNA levels were measured by Real time PCR in quiesced cells (ASMC (n=4), IASMC (n=3), and CALU-3 cells (n=3)). Data are expressed as mean  $\pm$  standard error of the mean. Abbreviations ASMC=airway smooth muscle cells, IASMC=immortalised airway smooth muscle cells, DMEM= Dulbecco's Modified Eagle Medium, FBS= Foetal bovine serum and BSA= bovine serum albumin.

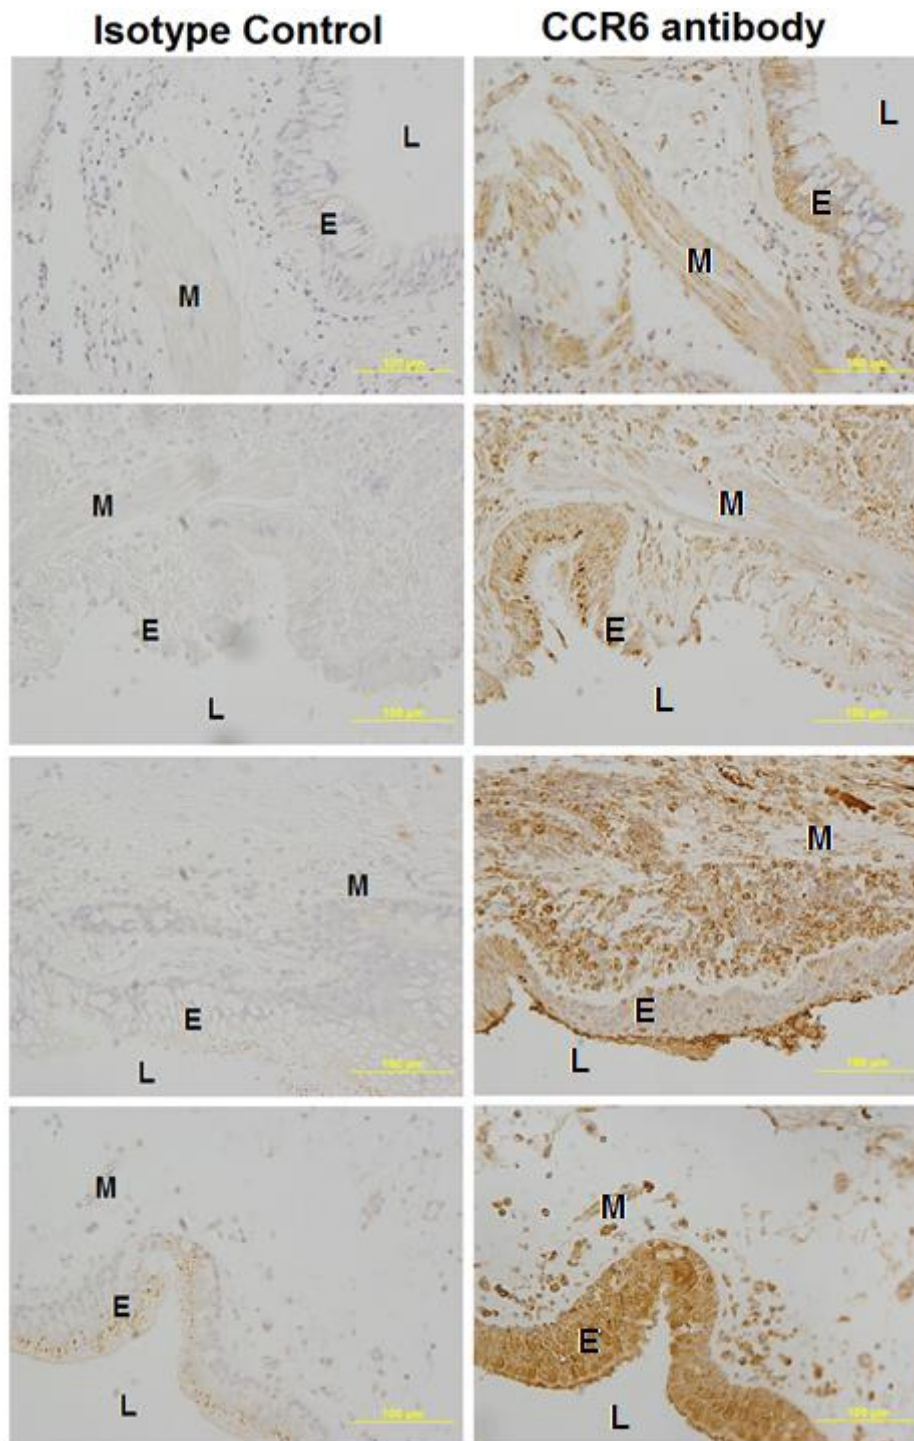

**Figure S2 Immunohistochemistry on paraffin embedded bronchus (>2mm) for CCR6.** CCR6 immunohistochemistry was conducted on non cancerous sections following lung resections (n= 4)(representative images). Specific staining was detected using a chemical chromophore DAB (brown) and cell nucleus was counterstained with haematoxylin (blue)(scale 100µm). Abbreviations M= Airway Smooth Muscle, L= Lumen, E = Epithelium



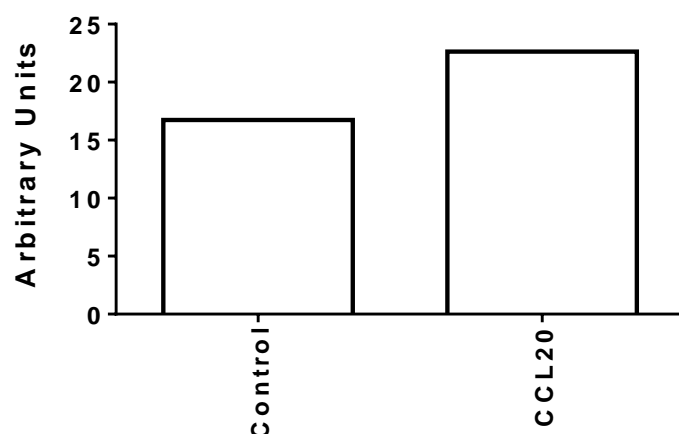

**Figure S3 Densitometry analysis of Alcian blue staining in ALI's derived from primary airway epithelial cells treated with CCL20.** Primary airway epithelial cells grown in air-liquid interface treated on day 28 with either C) PBS or CCL20 10ng/ml for 48 hours (n=1).

**Table S1. Patient characteristics for RNA-Seq results**

|                  | Asthma          | Healthy      |
|------------------|-----------------|--------------|
| N                | 16              | 39           |
| Age (years)      | 44.72±12.93     | 38.95±18.9   |
| Gender male n(%) | 8 (50)          | 19(48.7)     |
| FEV1 % predicted | 84.45±9.63**    | 101.95±11.67 |
| PC20             | 218.61±296.29** | 630.52±59.23 |

Data are presented as mean± SD unless stated otherwise. Differences in variables before and after treatment were analysed using a two-sided, Student's t test.

\*\*p<0.01 versus healthy.

FEV1, forced expiratory volume in one second; PC20, provocative dose of Adenosine 5'-Monophosphate (AMP) causing a 20% fall in FEV1

167 **Table S2. Top 50 genes altered by IL1 $\beta$  compared to baseline (FDR adjusted p**  
168 **value<0.05)**

| Gene Symbol | Gene Name                                                                           | log FC | p value  |
|-------------|-------------------------------------------------------------------------------------|--------|----------|
| CXCL10      | chemokine (C-X-C motif) ligand 10                                                   | 7.75   | 2.87E-12 |
| IL8         | interleukin 8                                                                       | 7.60   | 1.02E-14 |
| CXCL1       | chemokine (C-X-C motif) ligand 1 (melanoma growth stimulating activity, alpha)      | 6.58   | 2.43E-14 |
| CXCL2       | chemokine (C-X-C motif) ligand 2                                                    | 5.82   | 2.43E-14 |
| CXCL6       | chemokine (C-X-C motif) ligand 6                                                    | 5.48   | 1.50E-10 |
| TNFAIP2     | tumor necrosis factor, alpha-induced protein 2                                      | 5.33   | 4.56E-16 |
| GBP4        | guanylate binding protein 4                                                         | 4.87   | 1.91E-11 |
| IL6         | interleukin 6 (interferon, beta 2)                                                  | 4.80   | 2.28E-10 |
| GCH1        | GTP cyclohydrolase 1                                                                | 4.79   | 2.17E-12 |
| CCL20       | chemokine (C-C motif) ligand 20                                                     | 4.77   | 9.56E-12 |
| CYP7B1      | cytochrome P450, family 7, subfamily B, polypeptide 1                               | 4.72   | 1.55E-16 |
| BIRC3       | baculoviral IAP repeat containing 3                                                 | 4.64   | 1.17E-11 |
| TNFAIP3     | tumor necrosis factor, alpha-induced protein 3                                      | 4.61   | 1.44E-13 |
| ELOVL7      | ELOVL fatty acid elongase 7                                                         | 4.19   | 2.69E-10 |
| MFSD2A      | major facilitator superfamily domain containing 2A                                  | 3.92   | 2.53E-11 |
| CFB         | complement factor B                                                                 | 3.86   | 7.73E-12 |
| NFKBIZ      | nuclear factor of kappa light polypeptide gene enhancer in B-cells inhibitor, zeta  | 3.69   | 5.16E-12 |
| MARCH3      | membrane-associated ring finger (C3HC4) 3, E3 ubiquitin protein ligase              | 3.60   | 1.46E-11 |
| SLC39A14    | solute carrier family 39 (zinc transporter), member 14                              | 3.39   | 9.64E-12 |
| C15orf48    | chromosome 15 open reading frame 48                                                 | 3.28   | 2.41E-10 |
| IRAK2       | interleukin-1 receptor-associated kinase 2                                          | 3.17   | 1.22E-10 |
| NFKBIA      | nuclear factor of kappa light polypeptide gene enhancer in B-cells inhibitor, alpha | 3.17   | 5.27E-14 |
| RIPK2       | receptor-interacting serine-threonine kinase 2                                      | 3.15   | 3.17E-13 |
| GBP3        | guanylate binding protein 3                                                         | 2.88   | 2.40E-10 |
| ZC3H12A     | zinc finger CCCH-type containing 12A                                                | 2.83   | 5.27E-14 |
| IRF1        | interferon regulatory factor 1                                                      | 2.81   | 7.16E-10 |
| CXCL3       | chemokine (C-X-C motif) ligand 3                                                    | 2.81   | 1.24E-09 |
| NFKB2       | nuclear factor of kappa light polypeptide gene enhancer in B-cells 2 (p49/p100)     | 2.56   | 5.27E-14 |
| PARP14      | poly (ADP-ribose) polymerase family, member 14                                      | 2.49   | 9.02E-10 |
| GBP2        | guanylate binding protein 2, interferon-inducible                                   | 2.45   | 6.18E-11 |
| SLC43A2     | solute carrier family 43 (amino acid system L transporter), member 2                | 2.41   | 6.18E-11 |
| RELB        | v-rel avian reticuloendotheliosis viral oncogene homolog B                          | 2.40   | 8.08E-12 |
| IKBKE       | inhibitor of kappa light polypeptide gene enhancer in B-cells, kinase epsilon       | 2.30   | 9.04E-13 |
| TAP2        | transporter 2, ATP-binding cassette, sub-family B (MDR/TAP)                         | 2.19   | 6.11E-13 |

|         |                                                                |      |          |
|---------|----------------------------------------------------------------|------|----------|
| WTAP    | Wilms tumor 1 associated protein                               | 2.16 | 1.34E-12 |
| IFNAR2  | interferon (alpha, beta and omega) receptor 2                  | 2.14 | 7.85E-11 |
| HIVP3   | human immunodeficiency virus type I enhancer binding protein 3 | 2.13 | 4.88E-10 |
| TNIP1   | TNFAIP3 interacting protein 1                                  | 2.10 | 1.58E-12 |
| MT2A    | metallothionein 2A                                             | 2.10 | 3.05E-11 |
| GPR37L1 | G protein-coupled receptor 37 like 1                           | 2.07 | 2.36E-10 |
| WTAP    | Wilms tumor 1 associated protein                               | 2.05 | 9.91E-13 |
| MT2A    | metallothionein 2A                                             | 2.04 | 1.46E-11 |
| IL32    | interleukin 32                                                 | 2.03 | 5.85E-10 |
| MT1JP   | metallothionein 1J, pseudogene                                 | 2.02 | 6.53E-13 |
| MT2A    | metallothionein 2A                                             | 1.99 | 2.23E-10 |
| NINJ1   | ninjurin 1                                                     | 1.96 | 2.04E-12 |
| BID     | BH3 interacting domain death agonist                           | 1.77 | 1.54E-11 |
| STX11   | syntaxin 11                                                    | 1.57 | 1.06E-09 |
| TRAF3   | TNF receptor-associated factor 3                               | 1.28 | 4.79E-11 |
| UXS1    | UDP-glucuronate decarboxylase 1                                | 1.08 | 1.46E-10 |

**Table S3.**

| Gene   | logFC    | p value  | FDR      |
|--------|----------|----------|----------|
| UBD    | -1.20299 | 2.19E-08 | 0.000419 |
| UBD    | -1.24331 | 2.52E-08 | 0.000419 |
| CXCL10 | -1.4818  | 3.38E-07 | 0.003749 |
| CXCL8  | -1.48886 | 1.64E-06 | 0.010912 |
| CCL20  | -1.10357 | 3.76E-06 | 0.017906 |
| UCA1   | -1.14167 | 9.29E-06 | 0.028705 |

## References

1. Faiz A, Tjin G, Harkness L, Weckmann M, Bao S, Black JL, et al. The expression and activity of cathepsins D, H and K in asthmatic airways. *PloS one* 2013; 8:e57245.
2. Faiz A, Donovan C, Nieuwenhuis MA, van den Berge M, Postma D, Yao S, et al. Latrophilin receptors: novel bronchodilator targets in asthma. *Thorax* 2017; 72:74-82.
3. Bossé Y, Paré PD, Seow CY. Airway wall remodeling in asthma: from the epithelial layer to the adventitia. *Current allergy and asthma reports* 2008; 8:357-66.
4. Hackett T-L, de Bruin HG, Shaheen F, van den Berge M, van Oosterhout AJ, Postma DS, et al. Caveolin-1 controls airway epithelial barrier function. Implications for asthma. *American journal of respiratory cell and molecular biology* 2013; 49:662-71.
